# Supplementary material for: Sporadic Creutzfeldt–Jakob Disease in the young (50 and below): 10-year review of United Kingdom surveillance
Source: Springer Nature journal article supplement (doi:10.1007/s00415-022-11467-3), 2022-11-05
Supplement: MOESM1 [file 415_2022_11467_MOESM1_ESM.pdf]

## Supplementary Materials

| <b>Presenting Symptom Category</b>    | <b>Symptoms</b>                                                                                                                       |
|---------------------------------------|---------------------------------------------------------------------------------------------------------------------------------------|
| Psychiatric & Behavioural Disturbance | depression, anxiety, paranoia, apathy, withdrawal, visual and auditory hallucinations, delusions, personality and behavioural changes |
| Cognitive Impairment                  | disorientation, attention deficit, memory impairment, navigational difficulties, dyscalculia                                          |
| Motor & Gait Abnormalities            | unsteadiness, clumsiness, incoordination, slowed movements, involuntary movements, tremors, myoclonus                                 |
| Speech Disturbance                    | dysarthria, dysphonia, mutism                                                                                                         |
| Language Disturbance                  | dysphasia, word finding difficulties, dyslexia                                                                                        |
| Visual Disturbances                   | diplopia, visual blurring, visual impairment, cortical blindness, visual illusions                                                    |
| Sensory Disturbance                   | numbness, tingling, pain (other than headache)                                                                                        |
| Auditory Disturbance                  | tinnitus, hearing difficulties                                                                                                        |
| Headache                              | tension-type headache, migrainous headache                                                                                            |
| Sleep Disturbance                     | insomnia, parasomnia, REM sleep disorder                                                                                              |
| Dizziness & Vertigo                   | vertigo, light-headedness, dizziness                                                                                                  |
| Fatigue & Malaise                     | -                                                                                                                                     |
| Seizures                              | -                                                                                                                                     |
| Other                                 | sinus congestion, coughing                                                                                                            |

Supplement 1 –Symptom category definitions
